# Supplementary material for: Patch-Type Vibration Visualization (PVV) Sensor System Based on Triboelectric Effect
Source: MDPI journal article supplement (doi:10.3390/s21123976), 2021-06-09
Supplement: s1 [file s1]

## Supplementary Information

### Patch-type vibration visualization (PVV) sensor system based on triboelectric effect

Sun Jin Kim<sup>†,1,\*</sup>, Myeong-Lok Seol<sup>†,2</sup>, Byun-Young Chung<sup>1</sup>, Dae-Sic Jang<sup>1</sup>, Jonghwan Kim<sup>1</sup> and Young Chul Choi<sup>1</sup>

<sup>1</sup> *Smart Structural Safety and Prognosis Research Division, Korea Atomic Energy Research Institute, 111 Daedeok-daero 989Beon-gil, Yuseong-gu, Daejeon 34057, Republic of Korea*

<sup>2</sup> *Center for Nanotechnology and Universities Space Research Association, NASA Ames Research Center, Moffett Field, California 94035, United States*

<sup>†</sup> *These authors contributed equally to this work*

<sup>\*</sup> *Correspondence: yesiamtoo@kaeri.re.kr*

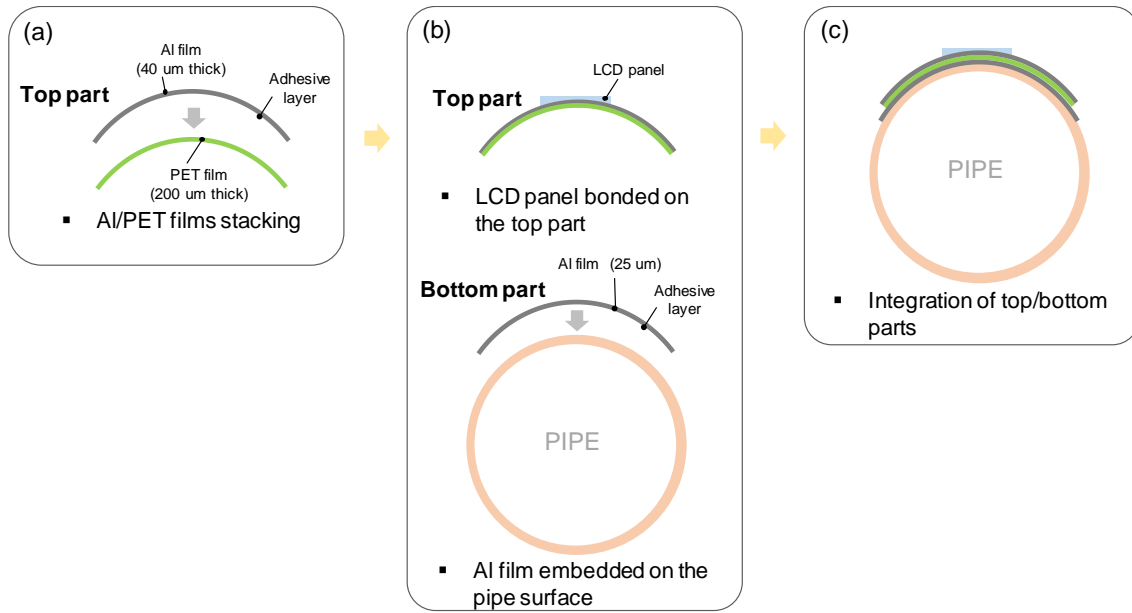

**Figure S1.** Schematic illustration of fabrication process of the PVV sensor system; (a) Stacking process of Al/PET films. (b) Bonding process of the LCD panel/top part using an adhesive. (c) Al film embedding on the pipe surface. (d) Integration process of top/bottom parts.

The integration process begins with stacking Al (40  $\mu\text{m}$  thick)/PET (100  $\mu\text{m}$  thick) films. After that, LCD panel is bonded onto the Al/PET film (top part). Meanwhile, a Al film is embedded onto the pipe surface (bottom part). Finally, the top and bottom parts are integrated.

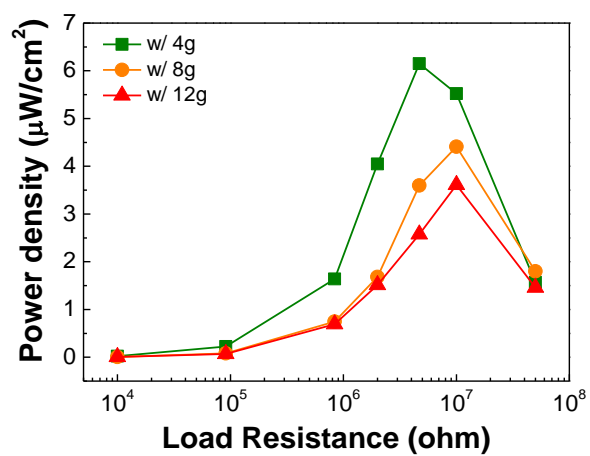

**Figure S2.** Power densities of the PVV sensors at the resonant frequencies as a function of load resistance.
